1 **Neuronal correlates of attentional selectivity and intensity in visual area V4**  
2 **are invariant of motivational context**

3 **Authors:** Supriya Ghosh\* and John H.R. Maunsell

4 **Affiliations:** Department of Neurobiology and Neuroscience Institute, The University of  
5 Chicago, Chicago, Illinois 60637, USA.

6 **\* Correspondence:** [sghosh5@uchicago.edu](mailto:sghosh5@uchicago.edu)

7 **Acknowledgements:** We thank Jackson J. Cone, Chery Cherian for helpful discussion and/or  
8 comments on the manuscript.

9 **Funding:** This work was supported by NIH grant R01EY005911. The funder had no role in  
10 study design, data collection and interpretation, or the decision to submit the work for  
11 publication.

12 **Ethics:** Animal experimentation: All experimental procedures were approved by the Institutional  
13 Animal Care and Use Committee (IACUC) protocols (#72355) of the University of Chicago and  
14 were in compliance with US National Institutes of Health guidelines.

## 15 **ABSTRACT**

16 Flexibly switching attentional strategies is crucial for adaptive behavior in changing environments.  
17 Depending on the context, task demand employs different degrees of the two fundamental  
18 components of attention— attentional selectivity (preferentially attending to one location in visual  
19 space) and effort (the total non-selective intensity of attention). Neuronal responses in the visual  
20 cortex that show modulation with changes in either selective attention or effort are reported to  
21 partially represent motivational aspect of the task context. The relative contributions and  
22 interactions of these two components of attention to modulate neuronal signals and their sensitivity  
23 to distinct motivational drives are poorly understood. To address this question, we independently  
24 controlled monkeys' spatially selective attention and non-selective attentional intensity in the same  
25 experimental session during a novel visual orientation change detection task. Attention was  
26 controlled either by adjusting the relative difficulty of the orientation changes at the two locations  
27 or by the reward associated with stimuli at two locations while simultaneously recording spikes  
28 from populations of neurons in area V4. We found that V4 neurons are robustly modulated by  
29 either selective attention or attentional intensity. Notably, as attentional selectivity for a neuron's  
30 receptive field location decreased, its responses became weaker, despite an increase in the animal's  
31 overall attentional intensity. This strong interaction between attentional selectivity and intensity  
32 could be identified in single trial spike trains. A simple divisive normalization of spatially  
33 distributed attention performances can explain the interaction between attention components well  
34 at the single neuron level. The effects of attentional selectivity and attentional intensity on neuronal  
35 responses were the same regardless of whether the changes were motivated by reward or task  
36 difficulty. These results provide a detailed cellular-level mechanism of how fundamental  
37 components of attention integrate and affect sensory processing in varying motivational and  
38 stimulus contexts.  
39

## 40 INTRODUCTION

41 Attention plays an essential role in motivating human behavior and cognition by selectively  
42 enhancing the processing of relevant sensory information. To engage and perform in cognitively  
43 demanding tasks, goal directed attention is often driven by external incentives. Many cortical and  
44 subcortical brain areas, including V4, change their activity when attention shifts<sup>1-4</sup>. They are also  
45 sensitive to the size of the reward that motivates those shifts<sup>5-11</sup>. Although reward expectation and  
46 attention have been described as conceptually distinct cognitive constructs (for review<sup>12</sup>), it  
47 remains challenging to distinguish these factors owing to their covariance and the high similarity  
48 of their effects on neuronal responses. Attentional levels can also be elevated owing to internal  
49 desire to complete a task without any apparent changes in external incentives, such as increased  
50 cognitive demand as a result of increased task difficulty<sup>13</sup>. For example, professional athletes or  
51 musicians address demanding situations with increased effort so as to maintain a given  
52 performance level. The contributions of different sources of motivation to regulation of sensory  
53 processing in cortex and overall perceptual behavior remain elusive.

54 In order to adapt to varying environmental and stimulus contexts, subjects shift their  
55 attention between spatially localized targets or selective stimulus features to spatially global targets  
56 or nonselective features. Many studies have characterized the neuronal modulations associated  
57 with selective attention by assaying how performance improves for attended spatial locations or  
58 stimulus features relative to distant locations or unrelated features. When a monkey's attention is  
59 selectively directed towards the location of a neuron's receptive field (RF), improvement in  
60 perceptual performance in that region is typically accompanied by increased spike rates<sup>4,14</sup>,  
61 reduced individual response variance and pairwise spike count correlations<sup>1,15</sup>. Although  
62 experimental studies most often treat attention as all-or-none, it has another fundamental aspect,  
63 intensity<sup>16</sup>—how strongly attention is focused independent of selectivity. Attentional intensity can  
64 be considered as an objective measure of perceived effort or cognitive engagement in a goal  
65 directed attention demanding task<sup>17</sup>. Attention related modulations of neurons in area V4 in  
66 primate visual cortex have been examined using a variety of visual detection tasks<sup>2,3,18,19</sup>. Some of  
67 these studies show that V4 neuronal activity is enhanced as a result of higher cognitive engagement  
68 or attentional effort in response to increased task demand<sup>13,20</sup>. It remains relatively unknown how  
69 selective attention and attentional intensity integrate in the brain to improve sensory perception  
70 and performance, and how motivational contexts influence these processes.

71 To address these questions, we trained monkeys to do an attention demanding visual task  
72 that allowed us to independently control the monkey's attentional selectivity and intensity in two  
73 different motivation contexts. We varied either task difficulty while reward size was kept fixed or  
74 varied reward size for a fixed task difficulty. Using simultaneous electrophysiological recordings  
75 from populations of V4 neurons and computational models, we found that attentional selectivity  
76 and intensity independently modulate neuronal spiking. Single trial spike trains encode  
77 multiplexed signals of attentional selectivity and intensity with comparable strengths in a way that  
78 is independent of the how the animal was motivated to allocate its attention. Further, the effects of  
79 attentional selectivity and intensity interact to determine the resultant influence of attention on  
80 spiking. A spatially tuned normalization model of attention can account for this interaction. Thus,  
81 we provided a detailed account of how fundamental components of attention interact at the level  
82 of V4 spikes. By extending the spectrum of attention-related cognitive representations in V4, the  
83 result provide help clarify how individual neurons contribute to higher-order cognition.

## 84 RESULTS

### 85 Independent control of attentional selectivity and intensity by varying task difficulty

86 We trained two rhesus monkeys to distribute their visual spatial attention between stimuli in the  
87 left and right hemifields while doing an orientation change detection task (**Figure 1a**). The animal  
88 held its gaze on a central fixation spot throughout each trial. After a randomly varying period of  
89 fixation, two Gabor sample stimuli appeared for 200 ms. This was followed by a delay of 200-300  
90 ms, after which a single Gabor test stimulus appeared at one of the two sample locations (selected  
91 pseudo-randomly). If the orientation of the test stimulus differed from the orientation of the sample  
92 stimulus that had appeared in that location (a target), the monkey had to rapidly make a saccade to  
93 the stimulus to earn a juice reward. On a random 50% the trials, the orientation of test stimulus  
94 was unchanged (a non-target) and the monkey was required to maintain fixation. In that case, a  
95 second test stimulus that always had a different orientation was presented after a short delay and  
96 monkey needed to saccade to this target stimulus to earn a reward.

97 To control the animal's attention, in each block of trials we set the orientation change of of  
98 the first test stimulus at each location to be either easy to detect ( $\sim 80^\circ$ ) or difficult to detect ( $\sim 18^\circ$ )  
99 (**Figure 1b**). In each block the size of the orientation change at the two locations was set  
100 independently, providing four possible combinations (**Figure 1c**). We measured the behavioral  
101 consequences of different combinations of difficulty by presenting an orientation change of  
102 intermediate difficulty ( $30^\circ$ , probe) on a randomly selected fraction of all trials ( $\sim 30\%$ ). These  
103 probe trials allowed us to directly compare behavioral sensitivity ( $d'$ ) at both location across all  
104 four block types. **Figure 1d** plots the average  $d'$ s for the left and right stimulus locations on probe  
105 trials for the two monkeys separately, with different colors representing the four different  
106 combinations of difficulty. Crosses mark mean  $d'$ s from individual sessions and gray lines join the  
107 four means from individual sessions. The changes in behavioral performance document that the  
108 animals responded to task difficulty by adapting their allocation of attention. Behavioral  $d'$  for the  
109 probe orientation change on each side was substantially higher when most orientation changes  
110 were difficult to detect, and lower when most changes were easy to detect, with approximately  
111 symmetrical  $d'$ s at both locations during most individual sessions.

112 Spatial selectivity of attention was quantified by selectivity index that measured the relative  
113 behavioral  $d'$  at the RF location compared to the opposite location (**Methods**). Attentional  
114 intensity was measured by overall absolute behavioral  $d'$ s in the two locations (**Methods**). The  $\sim 4$ -  
115 fold difference in orientation change (median easy change  $80^\circ$ , IQR  $80^\circ$ - $90^\circ$ ; median difficult  
116 change  $18^\circ$ , IQR  $16^\circ$ - $18^\circ$ ) strongly motivated animals to adjust their behavioral  $d'$ , whether the  
117 inter-block changes on the two sides were in opposite directions (blue arrows, **Figure 1d**) or in the  
118 same direction (gold arrows, **Figure 1d**). In both cases behavioral  $d'$  changed by  $\sim 2$ -fold  
119 (*selectivity indices* in the opposite direction: monkey S, for low RF  $d'$  mean  $-0.58$  SEM  $0.01$ ; for  
120 high RF  $d'$   $0.52$  mean  $0.01$  SEM,  $p < 10^{-12}$ ; monkey P, for low RF  $d'$  mean  $-0.41$  SEM  $0.02$ ; for  
121 high RF  $d'$  mean  $0.46$  SEM  $0.01$ ;  $p < 10^{-13}$ ; *attentional intensity* in the same direction: monkey S,  
122 for non-selective low  $d'$  mean  $1.46$  SEM  $0.04$ ; for non-selective high  $d'$  mean  $3.84$  SEM  $0.08$ ;  $p <$   
123  $10^{-9}$ ; monkey P, for non-selective low  $d'$  mean  $1.71$  SEM  $0.07$ ; for non-selective high  $d'$  mean  
124  $3.78$  SEM  $0.11$ ;  $p < 10^{-13}$ ; **Supplementary Table T1**). These changes in allocation of attention  
125 were driven by changes in task difficulty alone. Although reward sizes for correct responses were  
126 varied somewhat from trial to trial (see below), the average was kept the same on both sides across  
127 all task difficulty configurations (**Figure 1e**).

128 Non-luminance mediated task-evoked increases of pupil size are commonly considered a

129 proxy for arousal or attentional engagement and are sensitive to task demands across species<sup>21-23</sup>.  
130 Consistent with this, pupil area during the sample stimuli increased progressively with the increase  
131 in attention intensity ( $F_{(3, 76)} = 62.71$ ,  $p < 10^{-19}$  for monkey S;  $F_{(3, 84)} = 88.19$ ,  $p < 10^{-25}$  for monkey  
132 P, ANOVA; **Figure 1f**). Pupil area was greatest when discriminations were difficult on both sides,  
133 and smallest when they were easy on both sides.

#### 134 **Relative neuronal modulation of V4 with attentional selectivity and non-selective intensity**

135 We recorded from 1194 single units and small multi-unit clusters (single unit, 385; multiunit, 809)  
136 during 42 recording sessions from the two monkeys (monkey S, 20 sessions, 714 units; monkey  
137 P, 22 sessions, 480 units) using 96 channel multielectrode arrays chronically implanted in V4 in  
138 the superficial prelunate gyrus. Neurons typically responded more strongly to the sample stimuli  
139 during the trial blocks when the monkey's behavioral  $d'$  at the RF location was high. This increased  
140 spiking response was seen whether the behavioral  $d'$  differences involved different selectivity for  
141 the RF versus other location (red versus blue) or a change in attentional intensity with no change  
142 in selectivity (gold versus green). Importantly, the spike responses did not depend exclusively on  
143  $d'$  in the RF location. Neuronal responses during high non-selective behavioral  $d'$  (green, **Figure**  
144 **2a-b**) were reduced compared to responses with identical RF  $d'$  and low  $d'$  at the distant location  
145 (blue, **Figure 2a-b**).

146 To quantify neuronal modulation by attentional selectivity and intensity, we computed a  
147 neuronal  $d'$  as the difference of z-scored firing rates (60-260 ms from sample onset) between high  
148 and low attention states. The mean firing rate modulation was significantly greater for attention  
149 selectivity compared to non-selective intensity (neuronal  $d'$  for selective attention, mean $\pm$ SEM =  
150  $0.30\pm 0.01$ ; for non-selective attention, mean  $\pm$  SEM =  $0.22 \pm 0.05$ ,  $p < 10^{-31}$ ,  $n = 1194$ , t-test;  
151 **Figure 2c**). Single neurons and multiunit clusters separately showed similar spike modulation by  
152 attentional selectivity and non-selective intensity (single units,  $p < 10^{-7}$ ; multiunits,  $p < 10^{-26}$ ).  
153 These attentional effects were also significant for the monkeys individually (monkey S,  $p < 10^{-27}$ ;  
154 monkey P,  $p < 10^{-8}$ ).

155 Changes in attentional intensity with this task design do not rule out all forms of spatial  
156 selection because the animals might have attended to locations other than the two stimulus  
157 locations tested. If so, V4 neurons could have been modulated by the spatially selective shifting of  
158 attention from those other locations to the two stimulus locations. We examined the broader spatial  
159 distribution of attention by measuring the correlation between firing rate modulation and the  
160 proximity of a V4 neuron's RF and the attended Gabor stimulus (**Figure 2d**) using Mahalanobis  
161 distance to measure proximity. As expected, neuronal  $d'$  dropped substantially with increasing RF  
162 distance from the stimulus center when animals shifted their spatially selective attention  
163 (Spearman,  $\rho = -0.18$ ,  $p < 10^{-8}$ ; **Figure 2d**). In contrast,  $d'$  for the same neurons varied little with  
164 RF distance when animals were encouraged to adjust their attentional intensity (Spearman,  $\rho = -$   
165  $0.05$ ,  $p = 0.11$ ; **Figure 2d**), supporting the absence of spatially selective attention in this  
166 manipulation. Correlation between the RF distance and neuronal  $d'$  for attentional selectivity was  
167 significantly higher compared to attentional intensity ( $p = 0.002$ , z-test).

168 Because we recorded from the same fixed multielectrode arrays over many sessions, it is  
169 possible that some units were sampled in more than one session. We investigated the effect of  
170 potential resampling by analyzing a subsample that included only one unit from each electrode  
171 across all recording sessions ( $n = 85$  for monkey S,  $n = 80$  for monkey P). For this conservative  
172 set of unequivocally unique units, both the high selective and non-selective intensity increased  
173 spike rates and the modulation was stronger for selective than non-selective attention (mean  $\pm$

174 SEM neuronal  $d'$  for monkey S, selective attention,  $0.25 \pm 0.01$ , non-selective attention,  $0.19 \pm$   
175  $0.01$ ,  $p < 10^{-3}$ ; for monkey P, selective attention,  $0.31 \pm 0.02$ , non-selective attention,  $0.25 \pm 0.02$ ,  
176  $p = 0.02$ , t-test; **Supplementary Figure S2**) by amounts that were indistinguishable from the  
177 whole population. Thus, the results cannot be attributed to multiple sampling that might have  
178 occurred from units with uncharacteristic properties.

179 In addition to spike rate modulation, we tested the relative effects of attentional selectivity  
180 and non-selective intensity on signal-to noise of individual V4 units by measuring mean-matched  
181 Fano factor (the ratio of the variance of the spike counts to the mean). Fano factors during the  
182 sample stimulus period were significantly reduced by increased attention selectivity ( $F_{(1, 140996)} =$   
183  $236.82$ ,  $p < 10^{-10}$ , ANOVA) as well as intensity ( $F_{(1, 140996)} = 705.29$ ,  $p < 10^{-10}$ , ANOVA; **Figure**  
184 **2e**). Further, a significant interaction was detected between the selectivity and intensity on the  
185 Fano factor ( $F_{(1, 140996)} = 4.63$ ,  $p = 0.03$ , ANOVA). Similar to the signal-to-noise, pairwise spike  
186 count correlations of simultaneously recorded units were also reduced with higher attention  
187 selectivity and intensity (selectivity,  $F_{(1, 124917)} = 16.04$ ,  $p < 10^{-3}$ ; intensity,  $F_{(1, 124917)} = 167.04$ ,  $p <$   
188  $10^{-10}$ ; interaction,  $F_{(1, 124917)} = 7.12$ ,  $p = 0.008$ , ANOVA; **Figure 2f**). These results suggest that  
189 although the neuronal modulation by selective attention is stronger than the modulation by non-  
190 selective intensity, they share many similarities and both contribute appreciably to attention-  
191 related modulations.

## 192 **Independent control of attentional selectivity and intensity using differential reward size as** 193 **the external motivator**

194 Subjects are motivated in many different ways to allocate their attention. So far in our task, changes  
195 in task difficulty motivated monkeys to spatially redistribute their attention in order to match task  
196 demands. We next tested whether the encoding of attention components in V4 neurons depends  
197 on how animals are motivated to attend. For this, we instructed the same monkeys to shift their  
198 spatial attention by varying reward sizes between the two locations (**Figure 3a-b**). The size of the  
199 orientation change was kept constant and challenging on both sides throughout the session.  
200 Consequently, no probe orientation changes were needed or presented. The reward manipulation  
201 sessions were conducted on different days that were interleaved with the task difficulty sessions  
202 described in previous sections. The trial distributions and the probability of an orientation change  
203 in the two locations in opposite hemifields were same. Thus, the allocation of spatial attention  
204 across the hemifields were primarily motivated by the reward distributions. **Figure 3c** plots  
205 behavioral  $d'$  on the first test stimuli on the left and right sides for all four reward schedules.  
206 Behavioral  $d'$ s on both locations were symmetrical during most individual sessions.

207 The  $\sim 2.5$ -fold increase in reward size (median small  $136 \mu\text{l}$ , IQR  $87$ - $177 \mu\text{l}$ ; median large  
208  $340 \mu\text{l}$ , IQR  $305$ - $373 \mu\text{l}$ ; **Figure 3d**) strongly motivated animals to adjust their behavioral  $d'$ ,  
209 whether the direction of change on the two sides was opposite (blue arrows, **Figure 3c**) or the  
210 same (gold arrows, **Figure 3c**). In both cases behavioral  $d'$  changed by  $\sim 2$ -fold (opposite direction:  
211 selectivity indices in RF, monkey S, for low  $d'$  mean  $-0.64$  SEM  $0.02$ , for high  $d'$   $0.54$  mean  $0.02$   
212 SEM,  $p < 10^{-11}$ ; monkey P, low  $d'$  mean  $-0.47$  SEM  $0.02$ ; high  $d'$  mean  $0.48$  SEM  $0.02$ ;  $p < 10^{-$   
213  $11$ ; same direction: intensity indices, monkey S, for low non-selective intensity mean  $1.45$  SEM  
214  $0.05$ ; for high non-selective intensity mean  $3.72$  SEM  $0.1$ ;  $p < 10^{-9}$ ; monkey P, for low non-  
215 selective intensity mean  $1.53$  SEM  $0.07$ ; for high non-selective intensity mean  $3.70$  SEM  $0.09$ ;  $p$   
216  $< 10^{-10}$ ). These changes in attention allocation were produced by changes in reward size alone.

217 As with changes in task difficulty, high non-selective attention intensity mediated by  
218 reward size was also associated with increased pupil area during the sample stimuli ( $F_{(3, 76)} = 54.12$ ,

219  $p < 10^{-18}$  for monkey S;  $F_{(3, 60)} = 160.47$ ,  $p < 10^{-27}$  for monkey P; ANOVA; **Figure 3e**).

## 220 **Neuronal modulation of attention selectivity and intensity by differential reward size was** 221 **indistinguishable from task difficulty mediated modulation**

222 We recorded from total 1331 single units and small multi-unit clusters (single unit, 419; multiunit,  
223 912) in V4 during 36 reward manipulation recording sessions from the two monkeys (monkey S,  
224 20 sessions, 850 units; monkey P, 16 sessions, 481 units). Spike response modulation was similar  
225 to the effects observed when attention was controlled using task difficulty (**Figure 4a-c**).  
226 Population PSTHs for correctly completed trials increased with high selective attention inside the  
227 neuron's RF (orange and blue traces, **Figure 4a-b**). Spiking activity also increased for higher non-  
228 selective attention intensity but was relatively smaller compared to the modulation due to increased  
229 selective attention (yellow and green traces, **Figure 4a-b**). Neuronal  $d'$  for attention selectivity  
230 was higher than non-selective intensity (mean  $\pm$  SEM for selectivity,  $0.37 \pm 0.006$ ; intensity,  $0.24$   
231  $\pm 0.004$ ;  $p < 10^{-72}$ , t-test) and they were significantly correlated ( $\rho = 0.25$ ,  $p < 10^{-19}$ , Spearman;  
232 **Figure 4c**). Compared to the non-selective intensity, neuronal  $d'$  for attention selectivity dropped  
233 more strongly compared to non-selective intensity with the RF-sample stimulus (selective  
234 attention,  $\rho = -0.21$  ( $p < 10^{-13}$ ); non-selective intensity,  $\rho = -0.09$  ( $p = 0.0003$ );  $p = 0.005$ , z-test;  
235 **Figure 4d**). In addition to spiking, neurons' mean-matched Fano factor and pairwise spike-count  
236 correlations reduced with higher attentional selectivity and intensity (Fano factor, selectivity,  $p <$   
237  $10^{-315}$ , intensity,  $p < 10^{-136}$ ; pairwise correlations, selectivity,  $p < 10^{-36}$ , intensity,  $p < 10^{-6}$ ;  
238 ANOVA; **Figure 4e-f**). A significant interaction was also detected between the selectivity and  
239 intensity on the Fano factor ( $p < 10^{-5}$ , ANOVA) as well as pairwise spike-count correlations ( $p =$   
240  $0.039$ , ANOVA).

## 241 **Encoding of attention selectivity and intensity within single trial spike train**

242 Spike trains of V4 neurons provide dynamic information about many task relevant variables<sup>24</sup>. We  
243 next measured and compared the relative contributions of attentional selectivity and intensity on  
244 the within-trial instantaneous spiking of individual V4 neurons in varying difficulty and varying  
245 reward contexts using a generalized linear encoding model<sup>24</sup> (**Figure 5a**). The probability of an  
246 observed spike count within a small time window (50 ms) was modeled as an exponential function  
247 of a weighted linear combination of task variables: attentional selectivity (ratio of  $d'$ s at the RF  
248 location over the oppRF location), attentional intensity (radial distance from the inRF  $d'$ -oppRF  
249  $d'$  to the origin), selectivity-by-intensity interaction, orientation of the sample stimulus inside the  
250 neuron's RF and the direction of the eventual response saccade. The probability of a spike was  
251 constructed to follow a negative binomial distribution (**Methods**). Most neurons were well fit with  
252 this model (difficulty context, 1169/1194 (98%),  $p < 0.05$ ; reward context, 1311/1331 (98%),  $p <$   
253  $0.05$ ; F test). **Figure 5b** shows PSTHs of observed and model fitted spike counts in different  
254 attention conditions for trials in cross-validation test data sets for an example neuron in a session  
255 with varying task difficulty. **Figure 5c** illustrates fitted model components of attention for the same  
256 example neuron as in **Figure 5b**. The effective influence of distinct attention components on spike  
257 counts are expressed as multiplicative gains (exponentiated fitted coefficients) at a representative  
258 time during the sample stimulus (150 ms). The product of these gain components results in the  
259 predicted rate for a single trial (combined gain, bottom row). For an identical increase in behavioral  
260  $d'$  in the RF location, the increase in spike counts will be higher when the opposite-RF  $d'$  is small  
261 (blue arrow, **Figure 5c**) compared to large (green arrow, **Figure 5c**).

262 We next ask whether attentional selectivity, intensity and their interaction were encoded  
263 by distinct set of V4 neurons and task context affects these population representations. Many units

264 showed significant effects for several or all variables: attentional selectivity, intensity; and  
265 selectivity-by-intensity interaction (difficulty context: selectivity and intensity, 586/919 (64%),  $p$   
266  $< 10^{-10}$ ; selectivity and selectivity-by-intensity, 604/904 (67%),  $p < 10^{-10}$ ; intensity and selectivity-  
267 by-intensity, 621/772 (80%),  $p < 10^{-10}$ ; selectivity, intensity and selectivity-by-intensity, 542/934  
268 (58%),  $p < 10^{-10}$ ; reward context: selectivity and intensity, 709/1038 (68%),  $p < 10^{-10}$ ; selectivity  
269 and selectivity-by-intensity, 713/1033 (69%),  $p < 10^{-10}$ ; intensity and selectivity-by-intensity,  
270 710/871 (81%),  $p < 10^{-10}$ ; selectivity, intensity and selectivity-by-intensity, 642/1047 (61%).  $p <$   
271  $10^{-10}$  (61%);  $\chi^2$  test; **Figure 5d, f**). Further, these distributions were largely unchanged across  
272 the difficulty and reward contexts ( $p = 0.97$ ,  $\chi^2$  test). This mixed representation indicates  
273 multiplexed encoding of attention components by the same V4 unit.

274 We next compared the relative contributions of the cognitive and task variables on spike  
275 responses for individual units as measured by predictor importance (normalized magnitude of  
276 fitted coefficients, **Figure 5e, g**) (**Methods**). Following the onset of sample stimulus, stimulus  
277 orientation had a dominant contribution to the spike counts in both task contexts. This is expected  
278 because V4 neurons have robust visual responses and most are orientation selective. Attentional  
279 selectivity, intensity and selectivity-by-intensity interaction remained strong predictors of spike  
280 trains from the start of the trial, and increased immediately after the stimulus onset. Saccade direction  
281 contributed negligibly to V4 activity. Contributions of attention components were indifferent to  
282 the task contexts. Both animals showed similar results (**Supplementary Figure S3, S5**).  
283 Collectively, these results suggest that individual V4 neurons independently carry multiplexed  
284 information about selective attention and attention intensity in single trial spike trains relative to  
285 other sensory and task variable. These two attention components are integrated independent of the  
286 way the animal is motivated to allocate their attention.

## 287 **A normalization model of attention can account for the interactions between attentional** 288 **selectivity and intensity**

289 The decrease in V4 responses with the increase in behavioral  $d'$  in the opposite hemifield (blue to  
290 green, yellow to orange, **Figure 2d, 3c**) might seem unexpected, both because behavioral  
291 performance at the receptive field location does not change and because overall behavioral  
292 performance is better when the animal allocates high attention to both locations. This reduced rate  
293 of firing can be understood in the context of spike response normalization. To gain a mechanistic  
294 understanding of the observed interactions between attentional selectivity and non-selective  
295 intensity seen in V4 responses, we tested whether a simple extension of a sensory normalization  
296 model<sup>25</sup> with spatially distributed behavioral  $d'$  can account for these effects on spike responses.  
297 Mean stimulus evoked spike counts were expressed as:  $r = (d'_{in} * E_{in,G} + d'_{opp} * E_{opp,G}) / (d'_{in} * S_{in,G} +$   
298  $d'_{opp} * S_{opp,G} + \sigma)$ ; where  $d'_i$  represents behavioral  $d'$  at location  $i$  in or opposite the RF hemifield,  
299  $E_{i,G}$  and  $S_{i,G}$  represent excitation and suppression at location  $i$  due to the Gabor stimulus ( $G = 1$ ) or  
300 the background ( $G = 0$ ), and  $\sigma$  is baseline suppression (**Figure 6a** and **Methods**). Model  
301 parameters  $E_{i,G}$ ,  $S_{i,G}$  and  $\alpha$  were fit for each unit with the trial-averaged spike counts over 200 ms  
302 during the pre-stimulus fixation, sample and test interval periods on training datasets. Performance  
303 of the full model (*model with  $d'$* ) was measured on the 4-fold cross-validation test datasets  
304 subsampled across different stimulus configurations and attention conditions, and compared with  
305 two alternate models that lacked any behavioral  $d'$  factors: *model without  $d'$* , and *model without*  
306  *$d'$  and background display* (**Methods**)

307 The surface plot in **Figure 6b** shows mean spike counts fitted with the normalization model  
308 (*model with  $d'$* ) as a function of behavioral  $d'$ 's in two hemifields for an example unit in a difficulty



309 context session. Most units in the two task contexts were better fit with the attention model of  
310 normalization compared to alternate  $d'$ -independent normalization models (difficulty session:  
311 *model with  $d'$* , 910/1194 (76%), *model without  $d'$* , 626/1194 (52%), *model without  $d'$  and*  
312 *background display*, 479/1194 (40%), reward session: *model with  $d'$* , 1006/1331 (76%), *model*  
313 *without  $d'$* , 614/1331 (46%), *model without  $d'$  and background display*, 486/1331 (37%); variance  
314 explained  $>80\%$ ; **Figure 6c-d**). At the population level, the quality of normalization model fits of  
315 spike responses in the two task contexts did not differ ( $p = 0.23$ ,  $\chi^2$  test). The normalization  
316 model with  $d'$  captured multiple features of observed spike counts across different stimulus and  
317 attention conditions, including relative changes in spike counts across different and attention  
318 conditions, and neuronal modulation indices for attentional selectivity and intensity  
319 (**Supplementary Figure S7, Figure 6e-h**). Population correlation between the observed and  
320 normalization model estimated spike count modulation indices for attentional selectivity and  
321 intensity were strongly correlated across the task contexts (difficulty context: attentional  
322 selectivity,  $\rho = 0.87$ ,  $p < 10^{-10}$ , attentional intensity,  $\rho = 0.83$ ,  $p < 10^{-10}$ ; reward context: attentional  
323 selectivity,  $\rho = 0.89$ ,  $p < 10^{-10}$ , attentional intensity,  $\rho = 0.84$ ,  $p < 10^{-10}$ ; Spearman correlation  
324 coefficient; **Figure 6e-h**). Further, the model fitted excitatory and suppressive stimulus drives of  
325 recorded neurons decreased with the proximity of the neuron's RF and the stimulus irrespective of  
326 task context that motivated animals to attend (**Figure 6i-j**). Together, these results show that a  
327 simple normalization model captures the effects of attentional engagement at a distant site on the  
328 spike response in the RF location regardless of the stimulus or attentional context of that RF  
329 response.

## 330 DISCUSSION

331 We isolated the contributions of attentional selectivity and non-selective intensity to the activity  
332 of individual V4 neurons while precisely and independently controlling monkeys' behavioral  $d'$  at  
333 the RF location and a distant location in the opposite hemifield. Changes in either attentional  
334 selectivity or intensity independently are associated with overall increases in V4 spike rates and  
335 decreases in V4 spiking variability and pairwise spike count correlations. Further, spike rates were  
336 reduced when behavioral  $d'$  increased at a distant location in opposite hemifield. A spatially tuned  
337 response normalization model explained all these changes in spike rate across attention conditions  
338 and task contexts. Finally, single trial encoding of attentional selectivity, intensity and their  
339 interaction in V4 neurons were found to be independent of the way the subject is motivated to  
340 regulate its attention.

341 A functional role for the spiking of V4 neurons is supported by a correlation with enhanced  
342 sensory processing of an attended stimulus at the RF location, as well as impaired behavioral  
343 detection in subjects with V4 lesions. V4 lesions in macaques and humans impair attentional  
344 performance by making it difficult for the subjects to exclude irrelevant distractors<sup>26,27</sup>. However,  
345 our results reveal a mismatch between V4 spiking and behavioral performance: lower spike rates  
346 for the same behavioral performance when monkey's attention strategy shifts from spatially  
347 selective to non-selective high intensity at the RF location (**Figures 2b, 4a**). This raises questions  
348 about the relationship between neuronal signals in V4 and a subject's perceptions and  
349 performance. Other studies also found a dissociation between behavioral performance and activity  
350 in cortical visual areas, including V4<sup>5,24,28</sup>. That work showed dissimilar dynamics of top-down  
351 attentional control signals, sensory modulation and executive action. Specifically, when attention  
352 shifted, behavioral changes lagged changes in the spike rates of sensory neurons by seconds to

353 minutes, breaking the link between spikes and performance<sup>24</sup>. Our results show that a mismatch  
354 between V4 activity and behavior can also go beyond lags: when animals spread their field of  
355 attention beyond the RF, V4 spike rates go down even though the animals maintained the same  
356 behavioral  $d'$ . While a normalization mechanism can explain the reduced spiking (**Figure 6**) it  
357 does not address this disconnect with behavior. Changes in pupil diameter suggest that the animal  
358 in fact increased its total effort at both sites to maintain performance in the high effort condition  
359 (**Figures 1f, 3e**), making the reduced spike rates even less expected. Nevertheless, there is little  
360 reason to believe that behavioral performance should be uniquely determined by the strength or  
361 quality of sensory signals in any one brain region. A primate brain doing an attentionally-  
362 demanding task depends on contributions from many structures throughout the neuraxis. Even if  
363 perceptual stages perform perfectly, overall behavioral performance can be affected by distractions  
364 and lapses associated with activity in other brain stations. The somewhat reduced spike rates in V4  
365 that occur with high attention to both hemifields might in fact lower performance, but be  
366 counterbalanced by attention-related changes in other structures that enhance performance by  
367 reducing errors related to factors like distractions or motor error.

368 In the current experiments, monkeys were motivated to direct their spatial attention by  
369 expectation of either larger rewards or higher task demands associated with two locations. The  
370 invariance of neuronal modulations in V4 with these two distinct motivational factors suggest that  
371 these effects depend on a common top-down cognitive control and do not represent reinforcement  
372 signals to any appreciable extent. This notion is further supported by previous reports of weak  
373 evidence of encoding of reward information by single trial spike counts of V4 neurons across  
374 different attention states and during state transitions<sup>24</sup> (but see<sup>5</sup>). Motivation plays a crucial role in  
375 influencing attention control, giving priority to the most appropriate goal among multiple  
376 competing targets. Both humans and animals can be motivated to execute actions either for  
377 intrinsic pleasure or for satisfying some basic needs such as hunger, thirst, etc. Several brain  
378 structures within the frontoparietal network are modulated by motivationally salient signals such  
379 as errors, rewards and penalties<sup>29</sup>. Although various forms of motivations (intrinsic and extrinsic)  
380 can have different origins, they have common nodal points in the striatum and prefrontal cortex  
381 that receive dopaminergic afferents that play a crucial role in reward learning<sup>30</sup>. Consistent with  
382 this, previous evidence points to common cortico-limbic neural pathways that are activated by  
383 either changes in expectation of reward or changes in task difficulty<sup>31</sup>.

384 Our results show a close relationship between attentional intensity and “effort”. Previous  
385 work has associated cognitive effort exclusively with changes in task difficulty, and viewed it as  
386 a specific type of “arousal” that is distinguishable from other forms of arousal elicited by  
387 exogenous factors such as stress, novel stimuli and drugs<sup>16</sup> (but see<sup>32</sup>). The manifestation of  
388 attentional intensity on regulating visual sensory processing of V4 neurons in both of our task  
389 contexts instead supports identifying effort as an intensive aspect of attention<sup>16</sup>. It is possible that  
390 the component of bottom-up stimuli driven arousal that affects performance might map well onto  
391 the neuronal modulation associated with attentional intensity or effort. Future experiments with  
392 precise and independent control of these cognitive components in simultaneous tasks might  
393 identify their precise relationships and how subjective experience of effort relates to attentional  
394 intensity. Other important questions to be addressed concern the circuit, cellular and molecular  
395 mechanisms that mediate attentional intensity. These could involve activation of diverse  
396 neuromodulatory systems such as norepinephrine, acetylcholine, serotonin<sup>6,33-37</sup>.

397 V4 spike responses for varying attentional selectivity and intensity were well explained by  
398 an extension of normalization model of visual responses<sup>38</sup> with spatially tuned attentional gain

399 factors represented by behavioral  $d'$ . A similar normalization model with uniform attentional  
400 effects on excitation and surround suppression have been previously used in explaining neuronal  
401 modulations in V4 with spatially selective attention<sup>25</sup>. Previous normalization models considered  
402 attentional effects on stimulus-induced excitation and surround suppression. To explain a modest  
403 but non-zero neuronal modulation during the fixation period in absence of any stimulus, our  
404 normalization model included an attention effect on the background display similar to the visual  
405 stimulus. This is consistent with the evidence that attention acts as a constant gain factor<sup>3</sup>. Similar  
406 to reward expectations, increased task difficulty associated with spatial attention increases visual  
407 excitation<sup>13</sup> and response suppression<sup>20</sup> of V4 neurons. Further, response suppression with high  
408 task load is considered to serve as a mechanism for reducing peripheral interference and improving  
409 signal detection<sup>39</sup>. These reports are inconsistent with the correlated decrease in model estimated  
410 excitation and suppression with an increase in the proximity of neuron's RF and attended stimulus  
411 across task difficulty and reward expectation contexts. Together, this normalization model of  
412 attention provides a canonical neuronal computation to explain how distributed spatial attention  
413 influences neuronal responses. Future experiments are required to examine how other forms of  
414 attention such as feature-based or bottom-up attention act on normalization mechanisms across  
415 different visual areas that are responsive to attentional modulation.

416 Taken together, our results provide new experimental evidence revealing how attentional  
417 selectivity and non-selective intensity interact and modulate sensory processing in visual cortex in  
418 reference to behavioral performance. Moreover, our study identified a computational mechanism  
419 of normalization through which spatially distributed attentional performances interact.

## 420 **METHODS**

### 421 **Subjects and surgery**

422 Two adult male rhesus monkeys (*Macaca mulatta*, 13 and 9 kg) were implanted with a titanium  
423 head post using aseptic surgical techniques before training began. After the completion of  
424 behavioral training (3 to 5 months), we implanted a 10x10 array microelectrodes with 400  $\mu\text{m}$   
425 spacing (Blackrock Microsystems) into dorsal visual area V4 of one hemisphere, between lunate  
426 and superior temporal sulci. The same two monkeys were used in a previous study that included  
427 some of the same neuronal responses, but described different findings<sup>24</sup>.

### 428 **Behavioral task**

429 During training and neurophysiological recording, the monkey sat in a primate chair facing a  
430 calibrated CRT display (1024 x 768 pixels, 100 Hz refresh rate) at 57 cm viewing distance inside  
431 a darkened room. Binocular eye position and pupil area were recorded at 500 Hz using an infrared  
432 camera (Eyelink 1000, SR Research). Trials started once the animal fixated within 1.5° of a central  
433 white spot (0.1° square) presented on a mid-level gray background (**Figure 1a**). The animal had to  
434 maintain fixation until its response at the end of the trial. After a fixation period of 400-800 ms,  
435 two achromatic Gabor sample stimuli appeared for 200 ms, one in each visual hemifield. After a  
436 variable delay of 200-300 ms, a Gabor test stimulus (test 1) appeared for 200 ms at one of the two  
437 target locations, randomly selected with equal probability. The test stimulus was identical to the  
438 preceding sample stimulus, except potentially its orientation. On half of the trials, the test 1  
439 stimulus had a different orientation (nonmatch trial) and the monkey had to make a saccade to that

440 target to receive an apple juice reward. On the remaining half of the trials, the test 1 stimulus had  
441 the same orientation as the corresponding sample stimulus (match trial), and the monkey had to  
442 maintain fixation until a second test stimulus with a different orientation (test 2, 200 ms) appeared  
443 in the same location after an additional delay of 200-300 ms. The monkey then had to saccade to  
444 that target to get a reward. Inter-trial intervals varied from 2-3 s. Stimuli were presented always in  
445 the lower hemifields at 2°-4° eccentricity. Gabors were static and odd-symmetric with the same  
446 average luminance as the background. Spatial frequency, size and base orientation of Gabor stimuli  
447 were optimized for one neuron recorded each day, and remained unchanged throughout each  
448 session (left, azimuth -2.5° to -4.5°, elevation -0.5° to -4.0°, sigma, 0.35° to 0.70°, spatial  
449 frequency 0.6 to 3.5 cycles/°; right, azimuth 1.8° to 5.5°, elevation -0.5° to -4.0°, sigma, 0.25° to  
450 0.58°, spatial frequency 0.7 to 3.0 cycles/°). On every trial, the orientation of the sample stimuli  
451 randomly took one of two values (independently), base orientation or orthogonal. Stimulus  
452 parameters and orientation changes remained fixed within a session and varied across sessions.  
453 Orientation changes differed between blocks when task difficulty was manipulated, but every  
454 block contained probe trials that had the same orientation change throughout a session (24°-40° for  
455 monkey S, 20°-40° for monkey P). Reward sizes for hits (correct response in nonmatch trial) and  
456 CRs (correct rejections in match trial) were adjusted by < 10% as needed to encourage the animal  
457 to maintain a behavioral criterion close to zero. Behavioral task was controlled using custom-  
458 written software (<https://github.com/MaunsellLab/Lablib-Public-05-July-2016.git>).

459 **Behavioral task contexts:** Animals were motivated to allocate their spatial attention using two  
460 different task contexts, varying task difficulty or varying reward size. In alternate sessions,  
461 animal's spatial distribution of behavioral  $d'$  at two locations in opposite hemifields was controlled  
462 by either of the task contexts. In task-demand context, selective attention and non-selective  
463 attentional intensity were controlled over interleaved blocks of trials (160-440 trials/block) by  
464 changing relative task difficulty at the two locations in opposite hemifields (**Figure 1c**).  
465 Orientation change randomly took one of two values, probe orientation change (~30% of the trials)  
466 or contextual orientation change (~70% of the trials). Contextual orientation change was small for  
467 difficult task (high task-demand) and large for easy task (low task demand) compared to the probe  
468 orientation change. A high behavioral  $d'$  (selective attention) at location 1 relative to the location  
469 2 was achieved by making the task difficulty high at the location 1 ( $\Delta\theta_{\text{context}}$ , 17°-20° for monkey  
470 S, 8°-22° for monkey P) and easy at the location 2 ( $\Delta\theta_{\text{context}}$ , 80°-90° for monkey S, 80°-90° for  
471 monkey P). A high non-selective behavioral  $d'$  (high non-selective attention intensity) was  
472 obtained by making the task difficulty high at both the locations ( $\Delta\theta_{\text{context}}$ , 15°-18° for monkey S,  
473 6°-22° for monkey P). A low non-selective behavioral  $d'$  (low non-selective attention intensity)  
474 was obtained by making the task difficulty easy at both the locations ( $\Delta\theta_{\text{context}}$ , 80°-90° for monkey  
475 S, 80°-90° for monkey P) (**Figure 1b**). Reward values for correct behavior responses were always  
476 the same across blocks on both sides and fixed.

477 In the differential reward context, selective attention and non-selective attention intensity  
478 were controlled over interleaved blocks of trials (120-220 trials/block) by changing reward size at  
479 the two locations (**Figure 3b**). There was only a single orientation change that remained fixed  
480 throughout the experiment session. A high selective behavioral  $d'$  (selective attention) at location  
481 1 relative to the location 2 was achieved by delivering high rewards at the location 1 compared to  
482 the location 2. High non-selective behavioral  $d'$  (high non-selective attention intensity) was  
483 controlled by delivering high rewards for correct responses at both locations. Similarly, a low non-  
484 selective behavioral  $d'$  (low non-selective attention intensity) was controlled by giving low

485 rewards for the correct responses at both locations. Animals were encouraged to maintain a  
486 behavioral target/non-target criterion close to zero by small adjustment of trial-by-trial reward ratio  
487 for hits and correct rejections (**Supplementary Figure S1**).

## 488 **Electrophysiological Recording and Data Collection**

489 Extracellular neuronal signals from the chronically implanted multielectrode array were amplified,  
490 bandpass filtered (250–7,500 Hz) and sampled at 30 kHz using a data acquisition system (Cerebus,  
491 Blackrock Microsystems). We simultaneously recorded from multiple single units as well as  
492 multiunits over 42 differential task-demand sessions (714 units and 20 sessions for monkey S; 480  
493 units and 22 sessions for monkey P) and 36 differential reward sessions (850 units and 20 sessions  
494 for monkey S; 481 units and 16 sessions for monkey P). At the start of each experimental session  
495 we mapped RFs and stimulus preferences of neurons while the animal fixated. These RFs were  
496 used to optimize the stimulus parameters. Spikes from each electrode were sorted offline (Offline-  
497 Sorter, Plexon Inc.) by manually well-defining cluster boundaries using principal component  
498 analysis as well as waveform features. Well isolated clusters were classified as single units from  
499 multiunits based on the isolation quality of unit clusters. The degree to which unit clusters were  
500 separated in 2D spaces of waveforms features (first three principal components, peak, valley,  
501 energy) was measured by Multivariate Analysis of Variance (MANOVA) F statistic using Plexon  
502 offline Sorter (Plexon Inc.). A unit cluster of MANOVA p-value of < 0.05 was considered as single  
503 unit which indicates that the unit cluster has a statistically different location in 2D space, and that  
504 the cluster is statistically well separated.

## 505 **Data Analysis**

506 **Behavioral Sensitivity ( $d'$ ), criterion:** All completed trials in the reward context and all probe  
507 orientation trials in task-demand context were included in our analysis. Behavioral sensitivity ( $d'$ )  
508 and criterion ( $c$ ) at a spatial location were measured from hit rates within nonmatch trials and FA  
509 rates within match trials as:

$$510 d' = \Phi^{-1}(\text{hit rate}) - \Phi^{-1}(\text{FA rate})$$

$$511 c = -\frac{1}{2} [\Phi^{-1}(\text{hit rate}) + \Phi^{-1}(\text{FA rate})]$$

512 where  $\Phi^{-1}$  is inverse normal cumulative distribution function. We measured average  $d'$  and  $c$   
513 within a session across all trials across blocks separately for four different attention conditions.

514 **Index of attentional selectivity and intensity:** Attention selectivity was measured by the relative  
515 value of the behavioral  $d'$  inside the RF location with respect to opposite RF location. The measure  
516 mapped directly onto polar angle in  $d'$ -space (**Figure 1d, 3c**) and was normalized to a range from  
517 -1 (inside RF  $d' = 0$ ) to 1 (opposite RF hemifield  $d' = 0$ ):

$$518 \text{selectivity index} = \frac{4}{\pi} \tan^{-1} \left( \frac{d'_{inRF}}{d'_{oppRF}} \right) - 1$$

519 Where,  $d'_{inRF}$  and  $d'_{OutRF}$  are the sensitivities in the two hemifields, inside and outside the recorded  
520 neurons' RFs. Attentional intensity represented the absolute value of total behavioral  $d'$  (distance  
521 from the origin in  $d'$  space):

$$522 \text{intensity index} = \sqrt{(d'_{inRF})^2 + (d'_{oppRF})^2}$$

523 **Pupil area:** All pupil area measurements were measured binocularly at 500 Hz while monkeys  
524 maintained fixation in absence of a luminosity change using infrared camera (EyeLink 1000, SR  
525 Research). Raw pupil areas were z-scored for each session and each eye separately. Mean pupil  
526 area was measured by averaging the z-scored pupil area during the 400 ms after sample  
527 appearance.

528 **Neuronal response modulation:** Only neurons with an average spike rate 60-260 ms after sample  
529 stimulus onset that was significantly ( $p < 0.05$ ) greater than the rate 0 to 250 ms before sample  
530 onset were used in the analysis. To construct peri-stimulus time histograms (PSTHs) for figures,  
531 spike trains were aligned to sample stimuli onset and averaged across trials and smoothed with a  
532 half Gaussian kernel (rightward tail, SD 15 ms). A spike rate modulation (**Figure 2c, 2d, 4c and**  
533 **4d**) was quantified by neuronal  $d'$  as:

$$534 \quad d'_{neuron} = \frac{\langle r_{high} \rangle - \langle r_{low} \rangle}{\sqrt{\frac{1}{2}(\sigma_{high}^2 + \sigma_{low}^2)}}$$

535 Where  $\langle r_x \rangle$  and  $\sigma_x$  are the average and SD of the spike counts within 60 to 260 ms from sample  
536 stimuli onset. Neuronal  $d'$ s were calculated for each unit separately for attentional selectivity and  
537 intensity. Neuronal modulation index (MI, **Figure 6e-h**) was measured as:

$$538 \quad MI = \frac{\langle r_{high} \rangle - \langle r_{low} \rangle}{\langle r_{high} \rangle + \langle r_{low} \rangle}$$

539 **Proximity between neuron's receptive field (RF) and sample stimulus:** Proximity between  
540 neuron's receptive field (RF) and sample stimulus was estimated by the Mahalanobis distance  
541 (standardized distance, **Figure 2d and 4d**). For each neuron, spatial RF was measured and fit using  
542 a bivariate Gaussian. We then calculated the Mahalanobis distance between probability densities  
543 of spatial RF and the Gaussian contrast profile of the Gabor stimulus.

544 **Fano factor:** Mean-matched Fano factor (**Figure 2e and 4e**) was measured using spike counts  
545 over 100 ms sliding windows in 2 ms steps for each neuron according to procedures described  
546 previously<sup>24,40</sup>. Then the variance and mean across trial was computed at every time bin. The  
547 greatest common distribution of means across neurons, attentional intensities and time bins were  
548 measured. In order to match the mean distribution to the common mean distribution, a different  
549 subset of neurons was randomly chosen (50 times) at every time bin and the average Fano factor  
550 was computed (ratio of the variance to the mean).

551 **Spike-count correlations:** Pearson correlation coefficients were computed for pairs of  
552 simultaneously recorded units on spike-counts over 200 ms (60-260 ms from sample stimuli  
553 onset), defined as the covariance of spike counts normalized by the variances of individual  
554 neurons:

$$555 \quad \rho_{12} = \frac{Cov(r_1, r_2)}{\sqrt{Var(r_1) * Var(r_2)}}$$

556 Where  $r_1$  and  $r_2$  are spike counts of neuron 1 and neuron 2 across trials. Pairwise spike-count  
557 correlations were binned according to the geometric mean of the evoked responses of the two  
558 neurons in 5 Hz intervals. Evoked response was computed and subtracting by the trial-averaged  
559 baseline spike rate (-200 to 0 ms from sample onset) from the trial-averaged spike rate during the  
560 sample (60-260 ms from sample onset) (**Figure 2f and 4f**).

561 **Generalized linear encoding model:** Generalized linear model (GLM) regression was used to  
562 estimate the encoding of different attention components and task variables in single trial spike  
563 trains. Spike counts ( $r$ ) over 50 ms bins with 10 ms shift in single trials were modeled to follow a  
564 negative binomial distribution. The negative binomial distribution is well suited for the purpose,  
565 as spike count variances of cortical neurons are most often equal to or greater than their  
566 means<sup>24,40,41</sup>. The details of the model implementation were described in an earlier study<sup>24</sup>. Briefly,  
567 expected value of spike count at each time bin according to the GLM was represented as:

$$568 \mu_r = \exp(\beta_0 + \beta_{sel}Sel + \beta_{int}Int + \beta_{sel*int}Sel * Int + \beta_{ori}Ori + \beta_{sac}Sac)$$

569 Where,  $\beta_i$  is the coefficient for the predictor variable  $i$ ; Sel, session averaged attentional selectivity,  
570 ratio of the behavioral  $d'$  at the RF location to the  $d'$  at the opposite hemifield location; Int, session  
571 averaged attentional intensity, distance from the origin in  $d'$  space; Sel\*Int, interaction between  
572 selectivity and intensity; Ori, orientation of sample stimulus inside neuron's RF; Sac, saccade  
573 choice (1 for saccade towards the RF, -1 for saccade opposite to the RF and 0 for saccade  
574 withheld). For the reward context dataset, we also used another alternate GLM containing an  
575 additional predictor variable, reward history.

$$576 \mu_r = \exp(\beta_0 + \beta_{sel}Sel + \beta_{int}Int + \beta_{sel*int}Sel * Int + \beta_{ori}Ori + \beta_{sac}Sac + \beta_{reward}Reward)$$

577 Here, reward represents average of reward values on the 3 immediately preceding trials. GLM was  
578 implemented in Matlab separately for each neuron. In order to compare different predictor  
579 coefficients, predictor variables were converted to z-scored values and fitted with GLMs to obtain  
580 standardized beta-coefficients. Goodness of fit for a given GLM was measured by residual  
581 deviance, pseudo R-squared value (Cragg & Uhler's method) and F-statistics compared to a null  
582 model.

583 Predictive performance of the GLMs was measured by cross validation. Observations in each  
584 neuron's dataset were split at random into 10 partitions. GLM fit was done on 9 training partitions  
585 and the remaining partition was used for cross-validation. This cross-validation error for each  
586 neuron was measured by:

$$587 error = \frac{1}{nk} \sum_{t=1}^k \sum_{i=1}^n (y_{i,t} - \hat{y}_{i,t})^2$$

588 Where  $n$  is the number of cross-validation trials;  $k$  is the number of time bins;  $y_{i,t}$  and  $\hat{y}_{i,t}$  are  
589 respectively recorded and GLM estimated spike count at  $t^{th}$  time bin in  $i^{th}$  trial. The quality of cross  
590 validation for neuron populations was measured by the Spearman correlation coefficients between  
591 the observed and GLM fit spike counts.

592 Relative importance of each predictor variable was measured by predictor importance (PI)  
593 expressed as the absolute z-statistic of each fitted predictor coefficient:

$$594 PI_{j,t} = \left| \frac{\beta_{j,t}}{SE(\beta_{j,t})} \right|$$

595 Where  $j = 1, 2, 3, \dots, m$ , predictor variables;  $t$  is time bin. A neuron with predictor coefficient  
596 different from zero ( $p < 0.05$ ; t-test) during the sample stimuli presentation (60 - 260 ms from  
597 sample on) was classified as sensitive to that predictor. Because of the exponential nonlinearity in  
598 the GLM, exponentiated fitted predictor coefficients were used to illustrate how attentional  
599 selectivity, intensity and their interaction (selectivity-by-intensity) influence on spike rates as a  
600 function of attentional selectivity and intensity (left, **Figure 5c**). as well as a function of behavioral  
601  $d'$ 's at the RF location and opposite hemifield location (right, **Figure 5c**). These components are  
602 combined multiplicatively to drive instantaneous spike rates of individual units.

603 **Normalization model:** Trial averaged spike counts over 200 ms across all attention conditions and  
 604 stimulus configurations were fit with three different normalization models. Two were simple  
 605 stimulus normalization models without any spatial tuning (*model without d' & background display*  
 606 and *model without d'*) and the third model was an extension of spatially tuned normalization model  
 607 (*model with d'*). All the 3 models were fit with 9 non-negative parameters and used the same set  
 608 of 27 training data points out of 36 using nonlinear least-squares solver (MATLAB lsqnonlin.m,  
 609 MathWorks). The quality of fit was measured by residuals using 9 cross-validation test data points  
 610 (4-fold cross-validation). The training dataset consisted of mean spike counts during 3 pre-sample  
 611 (-200 to 0 ms), 12 sample stimuli (60 -200 ms) across two Gabor orientations and four attention  
 612 conditions, 6 test 1 stimulus (60 - 200 ms) on left hemifield and 6 test 1 stimulus on right hemifield  
 613 across all four attention conditions and two Gabor orientations. Cross-validation (fourfold) test  
 614 dataset contained spike counts during 1 pre-sample, 4 during the sample stimuli, 2 during test 1  
 615 stimulus inside the RF location and 2 during test 1 stimulus in the opposite RF location across all  
 616 attention conditions and Gabor stimulus configurations.

617 Model without d' and without background display. Mean spike counts during the sample stimuli  
 618 period according to the normalization *model without d' & without background display* is described  
 619 as:

$$620 \quad r_{in,opp} = \frac{E_{in} + E_{opp}}{S_{in} + S_{opp} + \sigma}$$

621 Where fit parameters  $E_i$ ,  $S_i$  respectively represents excitation, suppression drives due to a Gabor  
 622 stimulus at  $i^{th}$  location (inRF or oppRF) and  $\sigma$  represents a constant baseline suppression. For every  
 623  $E_i$  (or  $S_i$ ), there are two parameters,  $E_{i,base}$  and  $E_{i,base+90}$  (or  $S_{i,base}$  and  $S_{i,base+90}$ ) associated with each  
 624 of the two Gabor orientations (base and base + 90°). The contrast term was 1 for the Gabor stimulus  
 625 and 0 for no-stimulus. Thus, the mean spike counts during the inRF and oppRF test 1 presentations  
 626 respectively are:

$$627 \quad r_{in,0} = \frac{E_{in}}{S_{in} + \sigma} \quad \text{and} \quad r_{0,opp} = \frac{E_{opp}}{S_{opp} + \sigma}$$

628 The mean of spike counts during the pre-sample period was zero.

629 Model without d'. According to the normalization model w/o d', mean spike counts during the  
 630 sample, test 1 and pre-sample periods are respectively described as:

$$631 \quad r_{in,opp} = \frac{E_{in} + E_{opp}}{S_{in} + S_{opp} + \sigma} \quad (\text{sample})$$

$$632 \quad r_{in,0} = \frac{E_{in} + E_{opp,0}}{S_{in} + S_{opp,0} + \sigma} \quad (\text{test 1 inRF})$$

$$633 \quad r_{0,opp} = \frac{E_{in,0} + E_{opp}}{S_{in,0} + S_{opp} + \sigma} \quad (\text{test 1 oppRF})$$

$$634 \quad r_{0,0} = \frac{E_{in,0} + E_{opp,0}}{S_{in,0} + S_{opp,0} + \sigma} \quad (\text{pre-sample})$$

635 Where,  $E_i$  (or  $S_i$ ) could be either  $E_{i,base}$  and  $E_{i,base+90}$  (or  $S_{i,base}$  and  $S_{i,base+90}$ ), excitatory (or  
 636 suppressive) stimulus drives at  $i^{th}$  location (inRF or oppRF) due to the two Gabor orientations;  $E_{i,0}$   
 637 (or  $S_{i,0}$ ) is the excitatory (or suppressive) drive due to the background display in absence of Gabor  
 638 stimulus. Only one common parameter was used for excitatory (or suppressive) drives at the



639 opposite RF location for both Gabor stimulus as well as background display, i.e.,  $E_{opp,base} =$   
640  $E_{opp,base+90} = E_{opp,0}$  and  $S_{opp,base} = S_{opp,base+90} = S_{opp,0}$ . Total 9 parameters were fit with the model.

641 Spatially tuned normalization model (*model with d'*). According to the normalization model with  
642  $d'$ , mean spike counts during the sample, test 1 and pre-sample periods are respectively described  
643 as:

$$644 \quad r_{in,opp} = \frac{d'_{in}E_{in} + d'_{opp}E_{opp}}{d'_{in}S_{in} + d'_{opp}S_{opp} + \sigma} \quad (\text{sample})$$

$$645 \quad r_{in,0} = \frac{d'_{in}E_{in} + d'_{opp}E_{opp,0}}{d'_{in}S_{in} + d'_{opp}S_{opp,0} + \sigma} \quad (\text{test 1 inRF})$$

$$646 \quad r_{0,opp} = \frac{d'_{in}E_{in,0} + d'_{opp}E_{opp}}{d'_{in}S_{in,0} + d'_{opp}S_{opp} + \sigma} \quad (\text{test 1 oppRF})$$

$$647 \quad r_{0,0} = \frac{d'_{in}E_{in,0} + d'_{opp}E_{opp,0}}{d'_{in}S_{in,0} + d'_{opp}S_{opp,0} + \sigma} \quad (\text{pre-sample})$$

648 Where,  $d'_{in}$  and  $d'_{opp}$  are respectively behavioral  $d'$  at the RF and opposite RF locations. The fit  
649 parameters are same as in *model without d'*. In **Figures 6i-j**, excitatory (or suppressive) drives  
650 across stimulus types were averaged at the RF location for each neuron and then the neurons  
651 sorted according to the distance

## 652 **Statistical analysis**

653 Unless otherwise specified, we used paired t-test and multifactor ANOVA for comparing normally  
654 distributed datasets. Normality was checked using a Kruskal-Wallis test.

## 655 **REFERENCES**

- 656 1 Cohen, M. R. & Maunsell, J. H. R. Attention improves performance primarily by reducing  
657 interneuronal correlations. *Nat. Neurosci.* **12**, 1594-1600 (2009).
- 658 2 Krauzlis, R. J., Lovejoy, L. P. & Zénon, A. Superior colliculus and visual spatial attention.  
659 *Ann. Rev. Neurosci.* **36**, 165-182 (2013).
- 660 3 McAdams, C. J. & Maunsell, J. H. R. Effects of attention on orientation-tuning functions of  
661 single neurons in macaque cortical area V4. *J. Neurosci.* **19**, 431-441 (1999).
- 662 4 Moran, J. & Desimone, R. Selective attention gates visual processing in the extrastriate cortex.  
663 *Front. Cogn. Neurosci.* **229**, 342-345 (1985).
- 664 5 Baruni, J. K., Lau, B. & Salzman, C. D. Reward expectation differentially modulates  
665 attentional behavior and activity in visual area V4. *Nat. Neurosci.* **18**, 1656 (2015).
- 666 6 Bouret, S. & Richmond, B. J. Sensitivity of locus ceruleus neurons to reward value for goal-  
667 directed actions. *J. Neurosci.* **35**, 4005-4014 (2015).
- 668 7 Ikeda, T. & Hikosaka, O. Reward-dependent gain and bias of visual responses in primate  
669 superior colliculus. *Neuron* **39**, 693-700 (2003).
- 670 8 Ramakrishnan, A. *et al.* Cortical neurons multiplex reward-related signals along with sensory  
671 and motor information. *Proc. Natl. Acad. Sci.* **114**, E4841-E4850 (2017).
- 672 9 Roesch, M. R. & Olson, C. R. Neuronal activity related to reward value and motivation in  
673 primate frontal cortex. *Science* **304**, 307-310 (2004).

- 674 10 Rorie, A. E., Gao, J., McClelland, J. L. & Newsome, W. T. Integration of sensory and reward  
675 information during perceptual decision-making in lateral intraparietal cortex (LIP) of the  
676 macaque monkey. *PloS one* **5**, e9308 (2010).
- 677 11 Stănişor, L., van der Togt, C., Pennartz, C. M. & Roelfsema, P. R. J. P. o. t. N. A. o. S. A  
678 unified selection signal for attention and reward in primary visual cortex. *Proc. Natl. Acad.*  
679 *Sci.* **110**, 9136-9141 (2013).
- 680 12 Maunsell, J. H. R. Neuronal representations of cognitive state: reward or attention? *Trends.*  
681 *Cogn. Sci.* **8**, 261-265 (2004).
- 682 13 Spitzer, H., Desimone, R. & Moran, J. Increased attention enhances both behavioral and  
683 neuronal performance. *Science* **240**, 338-340 (1988).
- 684 14 Luo, T. Z. & Maunsell, J. H. R. Neuronal modulations in visual cortex are associated with only  
685 one of multiple components of attention. *Neuron* **86**, 1182-1188 (2015).
- 686 15 Mitchell, J. F., Sundberg, K. A. & Reynolds, J. H. Spatial attention decorrelates intrinsic  
687 activity fluctuations in macaque area V4. *Neuron* **63**, 879-888 (2009).
- 688 16 Kahneman, D. *Attention and effort*. Vol. 1063 (Prentice-Hall, 1973).
- 689 17 Kahneman, D. & Beatty, J. Pupil diameter and load on memory. *Science* **154**, 1583-1585  
690 (1966).
- 691 18 Bisley, J. W. & Goldberg, M. E. Attention, intention, and priority in the parietal lobe. *Ann.*  
692 *Rev. Neurosci.* **33**, 1-21 (2010).
- 693 19 Treue, S. & Maunsell, J. H. R. Attentional modulation of visual motion processing in cortical  
694 areas MT and MST. *Nature* **382**, 539 (1996).
- 695 20 Boudreau, C. E., Williford, T. H. & Maunsell, J. H. R. Effects of task difficulty and target  
696 likelihood in area V4 of macaque monkeys. *J. Neurophysiol.* **96**, 2377-2387 (2006).
- 697 21 Beatty, J. Task-evoked pupillary responses, processing load, and the structure of processing  
698 resources. *Psychol. Bull.* **91**, 276 (1982).
- 699 22 Laeng, B., Sirois, S. & Gredebäck, G. Pupillometry: a window to the preconscious? *Perspect.*  
700 *Psychol. Sci.* **7**, 18-27 (2012).
- 701 23 Piquado, T., Isaacowitz, D. & Wingfield, A. Pupillometry as a measure of cognitive effort in  
702 younger and older adults. *Psychophysiology* **47**, 560-569 (2010).
- 703 24 Ghosh, S. & Maunsell, J. H. R. Single trial neuronal activity dynamics of attentional intensity  
704 in monkey visual area V4. *Nature Communications* **12**, 1-15 (2021).
- 705 25 Verhoef, B.-E. & Maunsell, J. H. R. Attention operates uniformly throughout the classical  
706 receptive field and the surround. *Elife* **5**, e17256 (2016).
- 707 26 DeWeerd, P., Peralta, M. R., Desimone, R. & Ungerleider, L. G. Loss of attentional stimulus  
708 selection after extrastriate cortical lesions in macaques. *Nat. Neurosci.* **2**, 753-758 (1999).
- 709 27 Gallant, J. L., Shoup, R. E. & Mazer, J. A. A human extrastriate area functionally homologous  
710 to macaque V4. *Neuron* **27**, 227-235 (2000).
- 711 28 Zénon, A. & Krauzlis, R. J. Attention deficits without cortical neuronal deficits. *Nature* **489**,  
712 434 (2012).
- 713 29 Ridderinkhof, K. R., Ullsperger, M., Crone, E. A. & Nieuwenhuis, S. The role of the medial  
714 frontal cortex in cognitive control. *Science* **306**, 443-447 (2004).
- 715 30 Kouneiher, F., Charron, S. & Koechlin, E. Motivation and cognitive control in the human  
716 prefrontal cortex. *Nat. Neurosci.* **12**, 939-945 (2009).
- 717 31 Vassena, E. *et al.* Overlapping neural systems represent cognitive effort and reward  
718 anticipation. *PLoS One* **9**, e91008 (2014).

- 719 32 Sarter, M., Gehring, W. J. & Kozak, R. More attention must be paid: the neurobiology of  
720 attentional effort. *Brain. Res. Rev.* **51**, 145-160 (2006).
- 721 33 Aston-Jones, G. & Cohen, J. D. An integrative theory of locus coeruleus-norepinephrine  
722 function: adaptive gain and optimal performance. *Ann. Rev. Neurosci.* **28**, 403-450 (2005).
- 723 34 Krueger, J. & Disney, A. A. Structure and function of dual-source cholinergic modulation in  
724 early vision. *J. Comp. Neurol.* **527**, 738-750 (2019).
- 725 35 Pinto, L. *et al.* Fast modulation of visual perception by basal forebrain cholinergic neurons.  
726 *Nat. Neurosci.* **16**, 1857 (2013).
- 727 36 Seillier, L. *et al.* Serotonin decreases the gain of visual responses in awake macaque V1. *J.*  
728 *Neurosci.* **37**, 11390-11405 (2017).
- 729 37 Thiele, A. & Bellgrove, M. A. Neuromodulation of attention. *Neuron* **97**, 769-785 (2018).
- 730 38 Heeger, D. J. Normalization of cell responses in cat striate cortex. *Vis. Neurosci.* **9**, 181-197  
731 (1992).
- 732 39 Chen, Y. *et al.* Task difficulty modulates the activity of specific neuronal populations in  
733 primary visual cortex. *Nat. Neurosci.* **11**, 974-982 (2008).
- 734 40 Churchland, M. M. *et al.* Stimulus onset quenches neural variability: a widespread cortical  
735 phenomenon. *Nat. Neurosci.* **13**, 369 (2010).
- 736 41 Shadlen, M. N. & Newsome, W. T. The variable discharge of cortical neurons: implications  
737 for connectivity, computation, and information coding. *J. Neurosci.* **18**, 3870-3896 (1998).  
738  
739

## 740 Figures

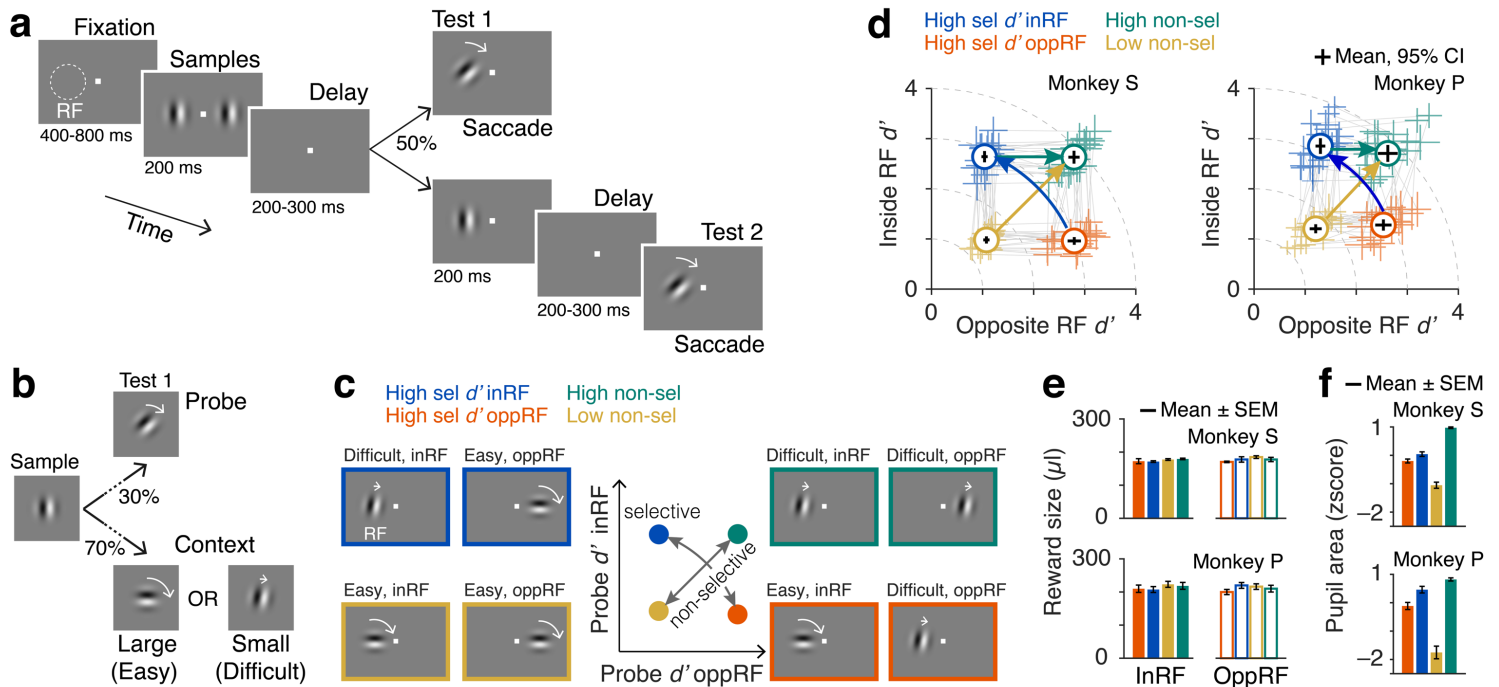

742 **Figure 1. Independent control of attentional selectivity and intensity using differential task**  
 743 **demands.** **a** Visual spatial attention task. Monkeys were required to fixate, attend to sample stimuli  
 744 (Gabors) presented in both hemifields (inside and opposite side of recorded neurons' receptive  
 745 field (RF)) and report an orientation change that occurred in one of the two test intervals by  
 746 making a saccade to the stimulus location. **b** Task demands. Orientation changes on ~30% of the  
 747 non-matched trials are intermediate (probe) and on the rest ~70% of the non-matched trials are  
 748 either large (easy context) or small (difficult context). **c** Centre, distribution of task difficulties  
 749 across two locations in opposite hemifields for four task conditions: high selective attention either  
 750 inside the RF (blue) or opposite RF location (orange) when attentional intensity remains fixed,  
 751 and low or high non-selective attentional intensity (yellow and green). Left and Right, Four  
 752 attention conditions consisted of different combinations of these task contexts (easy and difficult)  
 753 at the two stimuli locations. **d** Attention operating characteristic (AOC) curve, indicating  
 754 behavioral sensitivity ( $d'$ ) on individual sessions and their average (circles) for test stimuli inside  
 755 and opposite side RF during the four attention conditions, (sessions: 20 monkey S; 22 monkey P).  
 756 Grey lines connect attention conditions within a session. Dotted lines, iso-intensity lines. Error  
 757 bars, 95% confidence intervals. **e** Session averaged reward sizes across different attention  
 758 conditions for individual monkeys. **f** Session averaged pupil area (z-scored) during the sample  
 759 stimuli period. Error bars,  $\pm$  SEM.  
 760

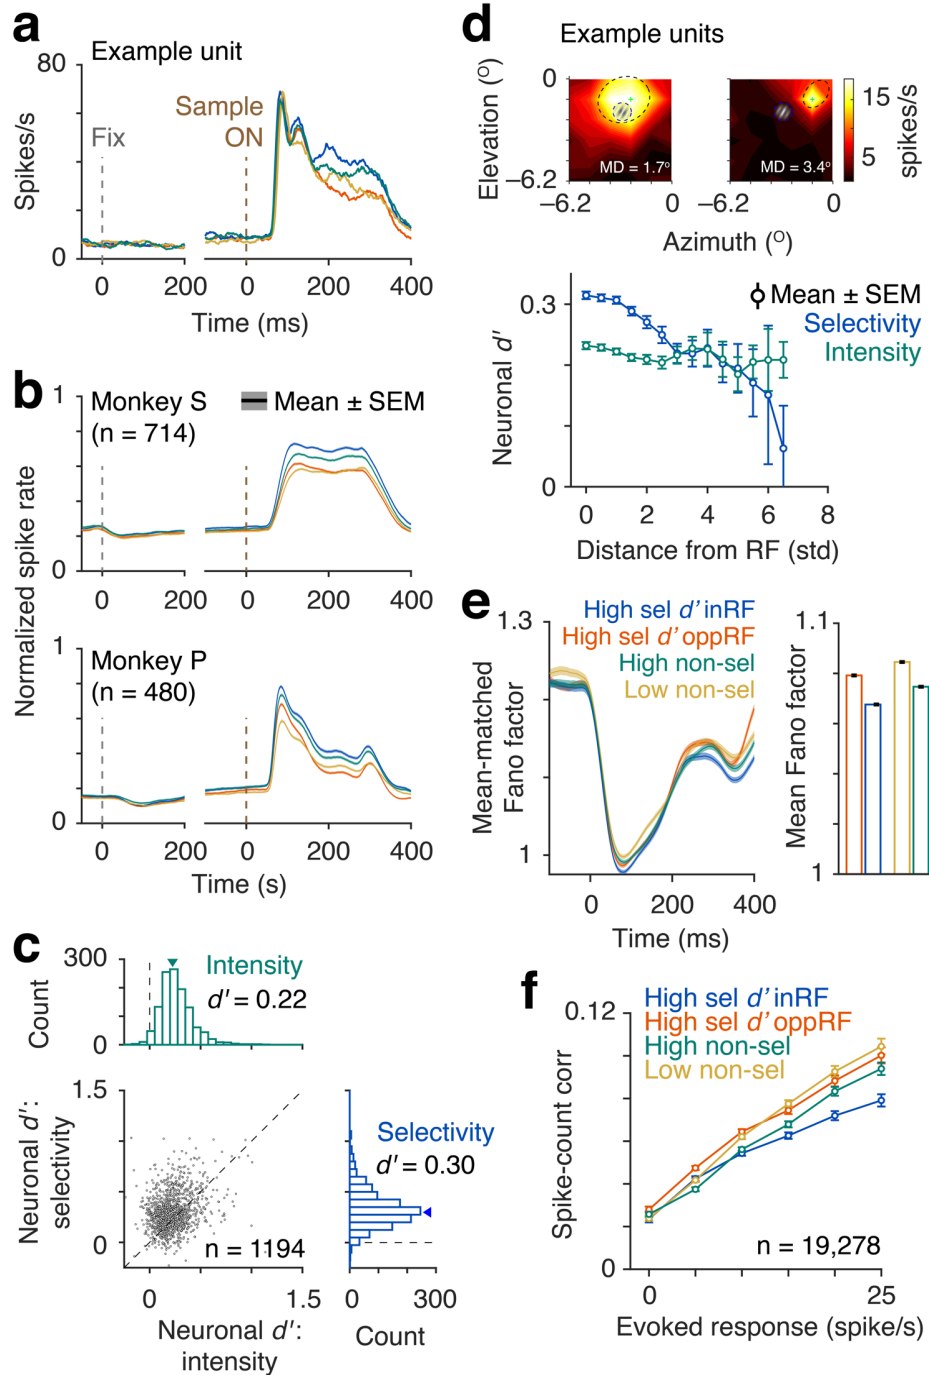

761  
762 **Figure 2. Neuronal modulation with changes in attentional selectivity and intensity.** *a* Peri-  
763 stimulus time histograms (PSTH) of spike rates of correct trials in different attention conditions  
764 for an example neuron in V4. Single trial spike counts were binned at 2 ms, smoothed with  $\sigma = 15$   
765 ms half-Gaussian and then aligned at the onset of sample stimulus. *b* Population PSTHs for  
766 monkey S (top) and monkey P (bottom). For population average, spike rates of each neuron were  
767 normalized to its peak response within 60 - 260 ms from sample stimulus onset (monkey S, n =  
768 714; monkey P, n = 480). *c* Distribution of neuronal  $d'$  for attentional selectivity and intensity of  
769 all units from both monkey S and P (n = 1194). *d* Top, Receptive field (RF) locations of two  
770 example units relative to the Gabor stimulus. MD, Mahalanobis distance measures the

771 *standardized distance between neurons' RF and Gabor stimulus in units of standard deviation.*  
772 *Bottom, Distribution of neuronal  $d'$  as a function of RF-Gabor distance. **e** Left, Mean-matched*  
773 *Fano factor. Right, Mean-matched Fano factor averaged over 60-260 ms from the sample onset.*  
774 *Error bars,  $\pm$ SEM. **f** Pairwise correlations between spike-counts of simultaneously recorded*  
775 *neurons over 60 to 260 ms from sample onset ( $n = 19,278$  pairs, all units) and binned according*  
776 *to their evoked responses (geometric mean of baseline subtracted spike counts). Error bars,  $\pm$ SEM.*

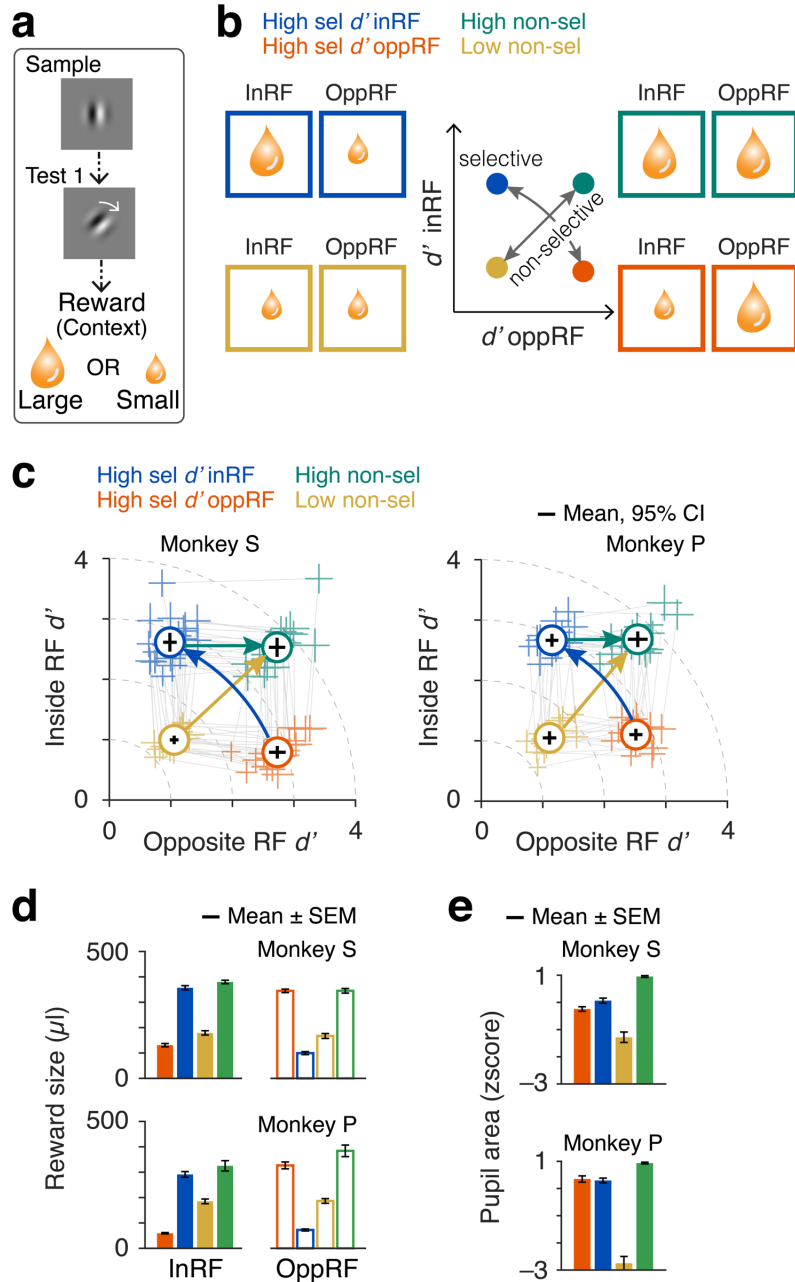

777

778 **Figure 3. Independent control of attentional selectivity and intensity using differential reward**  
 779 **size.** **a** Task demands. Orientation changes on  $\sim 30\%$  of the non-matched trials are intermediate  
 780 (probe) and on the rest  $\sim 70\%$  of the non-matched trials are either large (easy context) or small  
 781 (difficult context). **b** Centre, distribution of task difficulties across two locations in opposite  
 782 hemifields for four task conditions: high selective attention either inside the RF (blue) or opposite  
 783 RF location (orange) when attentional intensity remains fixed, and low or high non-selective  
 784 attentional intensity (yellow and green). Left and Right, Four attention conditions consisted of  
 785 different combinations of these task contexts (easy and difficult) at the two stimuli locations. **c**  
 786 Distribution of reward sizes across two stimulus locations (inRF and oppRF) for four attention  
 787 conditions. Attention conditions consist of different combinations of reward sizes at the two stimuli

788 *locations. d* Session averaged reward sizes across the four conditions for individual monkeys. *c*  
789 *Attention operating characteristic (AOC) curve, indicating behavioral sensitivity ( $d'$ , circles) on*  
790 *individual sessions and their average (solid markers) for test stimuli inside and opposite side RF*  
791 *during (sessions: 20 monkey S; 16 monkey P). Dotted colored lines indicate average  $d'$  in each*  
792 *hemifield. Lines connect two reward conditions within a session. Error bars, 95% confidence*  
793 *intervals. e* Session averaged pupil area (z-scored) sample stimuli periods. Error bars,  $\pm$ SEM.

794



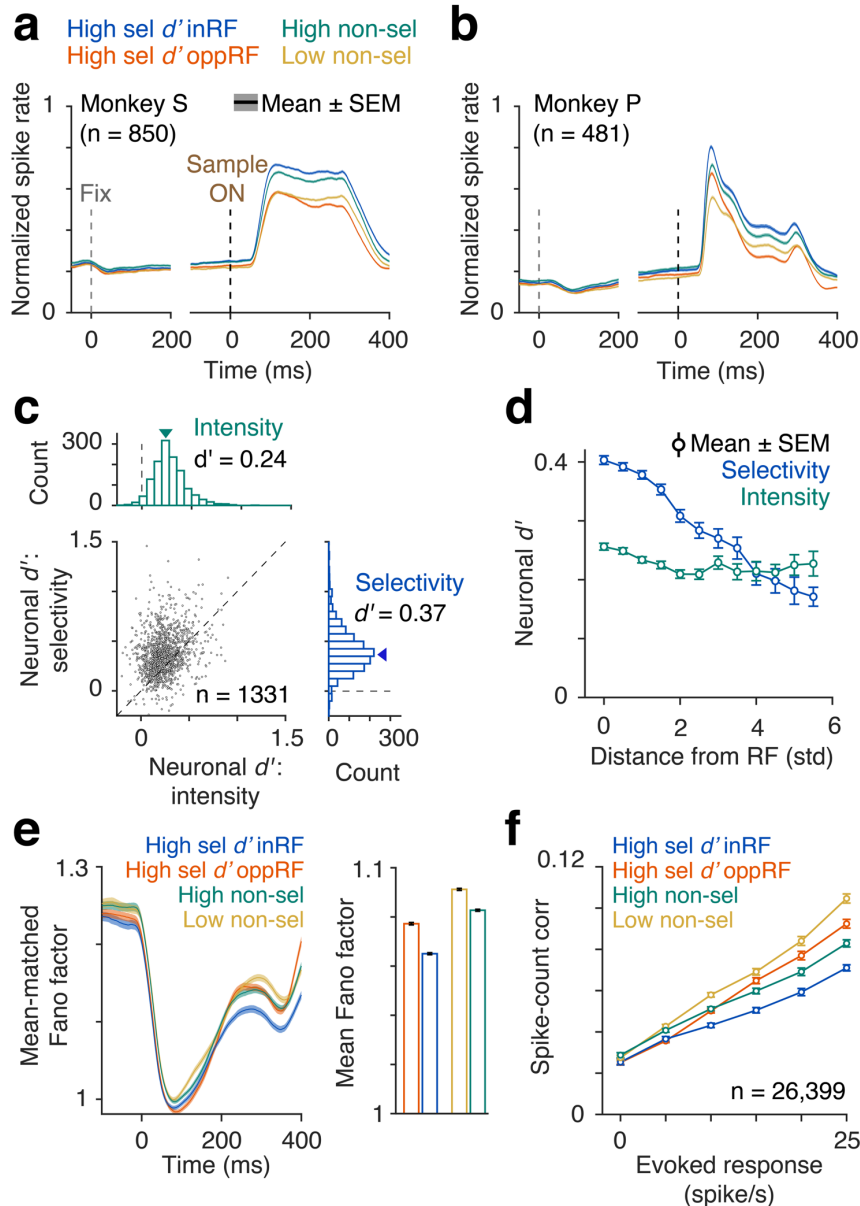

795

796 **Figure 4. Neuronal modulation with changes in attention components controlled by differential**  
 797 **reward size. a-b** Population PSTHs of spike rates of correct trials in different attention conditions  
 798 for monkey S (a) and monkey P (b). Single trial spike counts were binned at 2 ms, smoothed with  
 799  $\sigma = 15$  ms half-Gaussian and then aligned at the onset of sample stimulus. Spike rates of each  
 800 neuron were normalized to its peak response within 60 - 260 ms from sample stimulus onset  
 801 (monkey S, n = 850; monkey P, n = 481). **c** Distribution of neuronal  $d'$  for attentional selectivity  
 802 and intensity of all units from both monkey S and P (n = 1331). **d** Distribution of neuronal  $d'$  as a  
 803 function of Mahalanobis distance between neurons' RF and Gabor stimulus in units of standard  
 804 deviation. **e** Left, Mean-matched Fano factor. Right, Mean-matched Fano factor averaged over  
 805 60-260 ms from the sample onset. Error bars,  $\pm$ SEM. **f** Pairwise correlations between spike-counts  
 806 of simultaneously recorded neurons over 60 to 260 ms from sample onset (n = 26, 399 pairs, all  
 807 units) and binned according to their evoked responses (geometric mean). Error bars,  $\pm$ SEM.

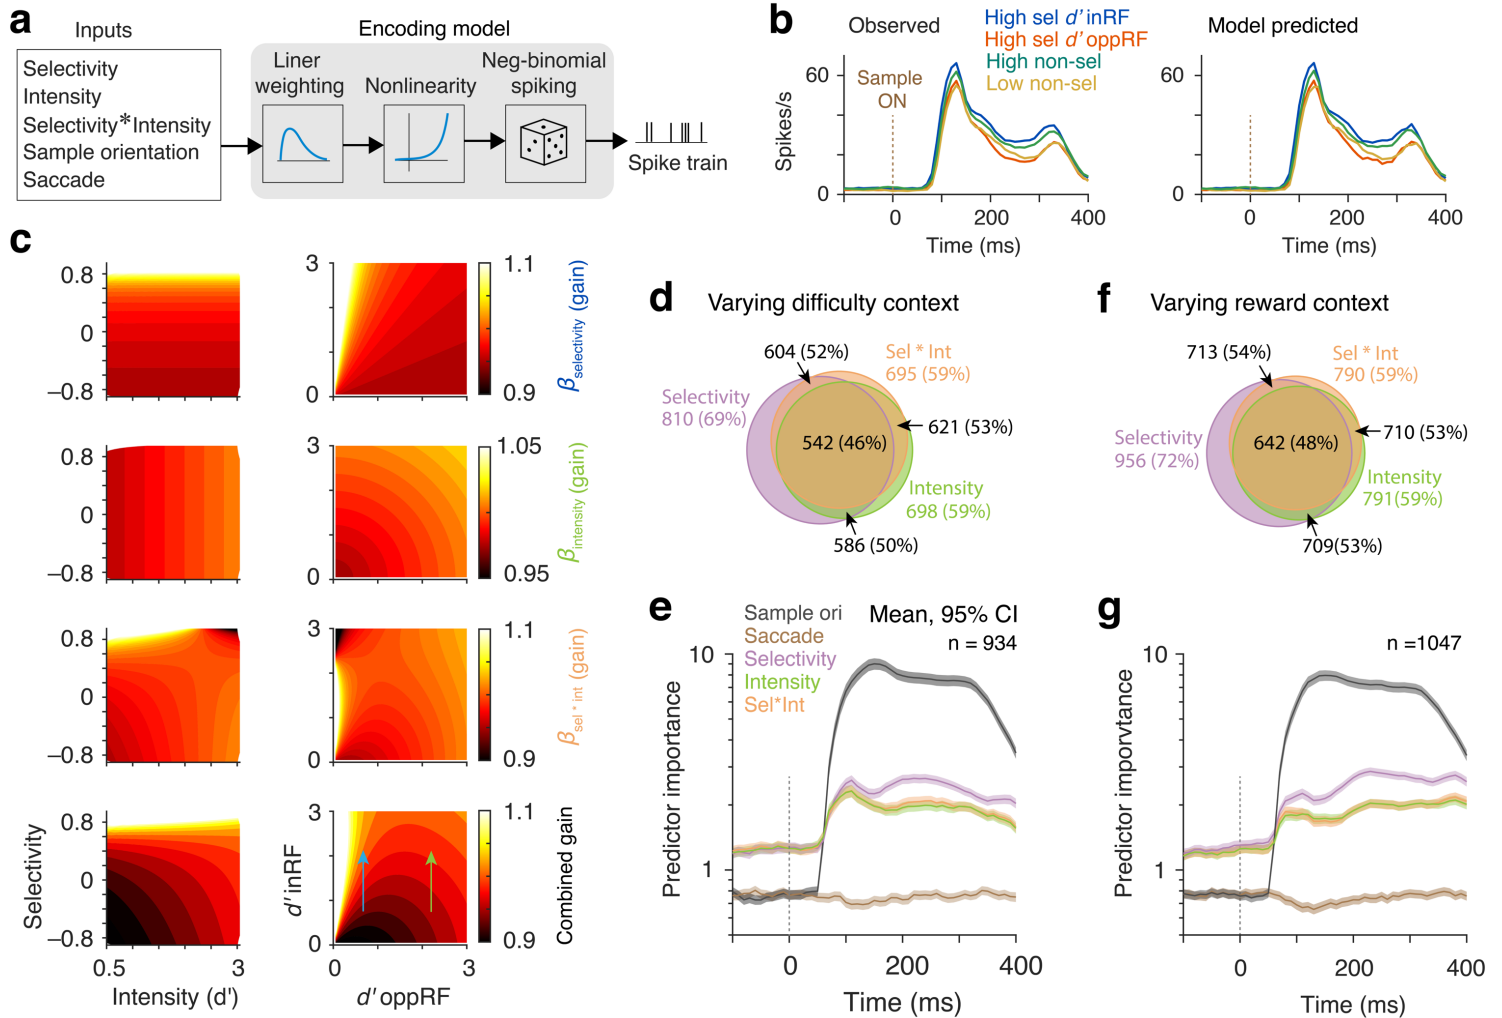

809 **Figure 5. Single trial encoding of attention components in different motivation contexts.** *a*  
 810 *Generalized linear encoding model. A neuron's spike count over 50 ms sliding window (10 ms*  
 811 *shift) is modeled as exponential function of linear combination of weighted ( $\beta$  coefficient)*  
 812 *experimental variables, stimulus orientation, saccade, attentional selectivity, attentional intensity*  
 813 *and their interaction selectivity\*intensity. **b** Model predicted (Left) and observed (Right) PSTHs*  
 814 *from cross-validation test-dataset for an example neuron in varying-difficulty context. **c***  
 815 *Distributions of GLM fitted coefficients (exponentiated gain) for attention components at a*  
 816 *representative time 140 ms as a function of attentional selectivity and intensity (left column), and*  
 817 *behavioral  $d$ 's oppRF and inRF (right column) for the same example neuron in **Figure 5b**. Sel\*Int,*  
 818 *selectivity-by-intensity interaction; Combined, resultant of all 3 attention components. These*  
 819 *components multiplicatively influence spike counts. **d-e** Varying task-difficulty context. Proportion*  
 820 *of neurons that are modulated ( $p < 0.05$ ) by attentional selectivity, intensity and selectivity-by-*  
 821 *intensity interaction estimated from the model (**d**). Comparing predictor importance (PI) that*  
 822 *measures contributions of different predictor variables estimated by absolute standardized*  
 823 *predictor coefficient values of all well fitted neurons (**e**). Error bars, 95% confidence intervals*  
 824 *(bootstrap,  $n = 10^4$ ). **f-g** Varying reward context. Same as **Figure 5d** and **5e** when attention was*  
 825 *controlled by differential reward sizes. Error bars, 95% confidence intervals.*

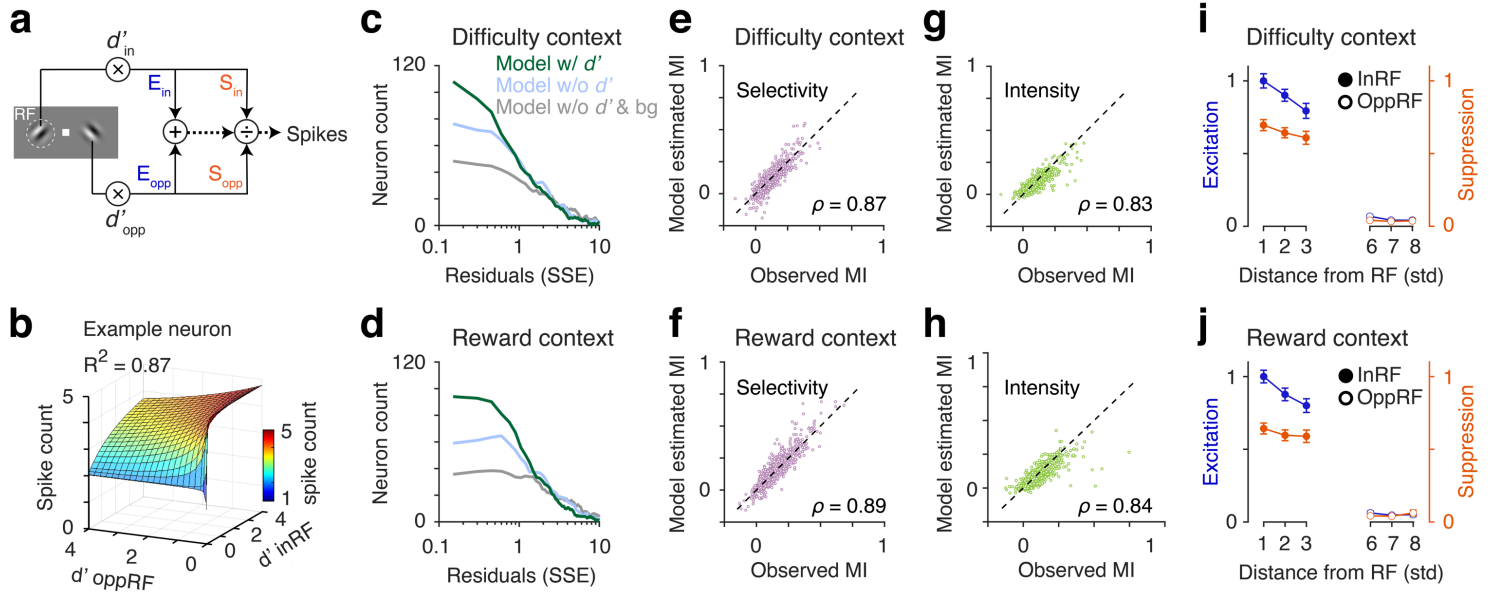

827 **Figure 6. Normalization model of attention can account for attentional intensity effects on spike**  
 828 **counts.** **a** Normalization model of attention. Spike count,  $r = (d'_{in} * E_{in,G} + d'_{opp} * E_{opp,G}) / (d'_{in} * S_{in,G}$   
 829  $+ d'_{opp} * S_{opp,G} + \alpha)$ . Where,  $d'_i$  is the behavioral  $d'$  at location  $i$  (inRF or oppRF).  $E_{i,G}$ ,  $S_{i,G}$  are  
 830 respectively excitation and suppression at location  $i$  due to either the Gabor stimulus ( $G = 1$ ) or  
 831 the background ( $G = 0$ ).  $\alpha$  is a constant. Spikes counts were fitted with 3 different models  
 832 (“Methods”). Model w/  $d'$ : contains behavioral  $d'$  values in two stimulus locations. Additionally,  
 833 there are excitation and suppression terms for background display. Model w/o  $d'$ : same as the  
 834 previous model except without the  $d'$  terms ( $d'_i = 1$ ). Model w/o  $d'$  & bg: Same as the previous  
 835 model, except without any  $d'$ s and excitation/suppression parameter due to the background ( $E_{i,G=0}$   
 836  $= 0$ ,  $S_{i,G=0} = 0$ ). **b** Fit of an example neuron with the normalization model w/  $d'$ . Surface plot, fitted  
 837 spike counts. **c-d** Quality of fit (SSE) for all recorded units in two behavioral contexts (difficulty  
 838 and reward) fitted with the three different normalization models. Spike-counts of the most of the  
 839 neurons were well fit with the normalization model w/  $d'$  compared to w/o  $d'$  models. **e, g**  
 840 Comparing spike-count modulations (modulation index, MI) with attentional selectivity (**e**) and  
 841 intensity (**g**) between observed and model fits for the cross-validation test datasets across difficulty  
 842 context sessions. MIs from observed and fitted spike counts are highly correlated (Spearman  
 843 correlation coefficient for selectivity,  $\rho = 0.87$ ,  $p < 10^{-100}$ ; for intensity,  $\rho = 0.83$ ,  $p < 10^{-100}$ ). **f, h**  
 844 Same as in (**e**) and (**g**) for reward context sessions (Spearman correlation coefficient for selectivity,  
 845  $\rho = 0.89$ ,  $p < 10^{-100}$ ; for intensity,  $\rho = 0.84$ ,  $p < 10^{-100}$ ). **i-j** Population averaged model fitted  
 846 excitation ( $E$ ) and suppression ( $S$ ) parameters from the normalization model w/  $d'$  across all units  
 847 binned according to the distance (Mahalanobis) of unit’s RF location from the Gabor stimulus  
 848 (same or opposite of the RF hemifield).
